# Supplementary material for: Fluorine dopants in tungsten sulfide boost the efficiency of H2O2electro-synthesisviathe oxygen reduction reaction
Source: Royal Society of Chemistry journal article supplement (doi:10.1039/d2cc03463h), 2022-01-01
Supplement: d2cc03463h1.pdf [file d2cc03463h1.pdf]

## Supporting information

for

### **Fluorine dopants in tungsten sulfides induce boosted efficiency of H<sub>2</sub>O<sub>2</sub> electro-synthesis from ORR catalysis**

Xue Long<sup>a</sup>, Ying Ling<sup>a</sup>, Chaofeng Chang<sup>a</sup>, Fang Luo<sup>b\*</sup> and Zehui Yang<sup>a</sup>

<sup>a</sup>Sustainable Energy Laboratory, Faculty of Materials Science and Chemistry, China University of Geosciences Wuhan, 388 Lumo RD, Wuhan, 430074, P. R. China.

<sup>b</sup>State Key Laboratory for Hubei New Textile Materials and Advanced Processing Technology, School of Materials Science and Engineering, Wuhan Textile University, 430200 Wuhan, P. R. China.

## **Experimental section**

Chemicals materials: Ammonium metatungstate ( $(\text{NH}_3)_6\text{H}_2\text{W}_{12}\text{O}_{40}\cdot x\text{H}_2\text{O}$ ) was purchased from Kunshan Xingbang Tungsten and Molybdenum Technology Co., Ltd., Jiangsu, Ammonium Fluoride ( $\text{NH}_4\text{F}$ ), ammonium sulfide solution ( $(\text{NH}_4)_2\text{S}$ ) and Hydrochloric Acid (HCl, Analytical pure) were obtained from China. Sinopharm Chemical Reagent Co. Ltd. All the chemicals above were used without further purification. Ultrapure water with a resistivity of  $18.25\Omega$  was used in this work.

Synthesis of Precursors: A certain amount of Ammonium metatungstate and 15ml ultrapure water were placed in a 200ml three-neck flask at room temperature to form a transparent and homogeneous solution by magnetic stirring for 10 mins. Then 17 mL of ammonium sulfide solution with a mass fraction of 8 wt % was added(W:S=1:10). At this time, the mixture above was dark green, and it was heated to  $70^\circ\text{C}$ . After 1 hour, the solution changed from dark green to orange. Let it cool to room temperature, slowly whisk 90 ml of 1M HCl into the solution under magnetic stir (Note:  $\text{H}_2\text{S}$  gas is produced at this step). The reddish-brown color of the solution means that the reaction is completed. Standing about 0.5 hour and then the red-brown deposit will be moved to centrifugal wash and dry.

**Preparation of  $\text{WS}_2$  and F-doped  $\text{WS}_2$ :** The dried precursor was collected and ground, followed by annealing at  $450^\circ\text{C}$  for 5 h with a heating rate of  $5\text{ K min}^{-1}$  in the  $10\%\text{H}_2/\text{Ar}$  for 4 hours to obtain the  $\text{WS}_2$ . Last, the mixed solid containing 0.04g of prepared  $\text{WS}_2$  and 0.1g of ammonium Fluoride was placed in a mortar and ground evenly, and then was thermally treated at  $200^\circ\text{C}$  in  $\text{N}_2$  at a heating rate of  $1\text{ K min}^{-1}$

for 2 hours to obtain the F-doped WS<sub>2</sub>.

### **Material Characterization**

The morphological characteristics of as-prepared samples were conducted by high-resolution field emission scanning electron microscope (FEI, SU8010, JPN). The crystal structure was carried out on powder X-ray diffractometer (Bruker AXS D8 Advance, GER) with a Cu K $\alpha$  radiation ( $\lambda = 0.15406$  nm) at a scan rate of 10° min<sup>-1</sup>. The surface element composition and chemical valence were determined by X-ray photoelectron spectroscopy (ESCALAB 250Xi, USA). The micromorphology and lattice information were collected by high-resolution transmission electron microscope (FEI Talos F200x G2, USA) with energy dispersive X-ray spectroscopy. The Raman spectroscopy were recorded utilizing handheld Raman spectrometer (BWS465-532H, USA) with a 532 nm excitation laser.

### **Electrochemical Measurements**

The ORR performance of prepared sample was carried out on an electrochemical workstation (CHI 760e) with standard three-electrode system, while a rotating ring-disk electrode (RRDE-GC1156) assembly consisting of a glassy carbon rotation disk electrode (GC: 5.61 mm inner diameter) and a Pt ring (6.25-7.92 mm) was used as work electrode which tend to be loaded with a certain amount of electrocatalyst on GC, carbon rod as the counter electrode and saturated calomel electrode (SCE) as the reference electrode. The collection efficiency (N=18%) of the RRDE was calibrated by redox reaction of [Fe(CN)<sub>6</sub>]<sup>4-</sup>/[Fe(CN)<sub>6</sub>]<sup>3-</sup> and all the potentials measured were corrected by the reversible hydrogen electrode ( $E_{RHE} = E_{Hg/HgO} + 0.244V + 0.059 * pH$ ).

The 0.1 M KOH with 13.0 of pH value as electrolyte used for the measurement. In order to uniformly load the catalyst, traditionally, 2 mg of as-prepared catalyst was mixed with 1 ml liquids containing 15  $\mu$ l of 5 wt % Nafion solution, 205  $\mu$ l ethanol and 780  $\mu$ l ultrapure water, and sonicated for at least 30 mins to gain a homogeneously dispersed catalyst ink, which be pipetted onto glassy carbon disk to achieve 0.1mg/cm<sup>2</sup> of catalyst load. The electrolyte was saturated with oxygen by constantly bubbling high-purity O<sub>2</sub> for 30 mins before each electrochemical test and the O<sub>2</sub> was maintained over the electrolyte during the recording process. The precycling steps was conducted by cyclic voltammetry from 0 to 1.2V (vs. RHE) at a scan rate of 50 mV s<sup>-1</sup> at 1600 r.p.m for activating surface of the electrode, in which coincident cyclic curves were obtained. Then, the productivity of H<sub>2</sub>O<sub>2</sub> was investigated by Linear sweep voltammetry, which was conducted by scanning from 0 to 1.2V (vs. RHE) at a scan rate of 5 mV s<sup>-1</sup> with 1600 rpm, while the Pt ring potential was kept at 0.5V (vs. RHE). The stability of catalysts was tested by chronoamperometry at 0.6 V (vs. RHE) with a 1600 rpm rotating speed in O<sub>2</sub>-saturated electrolyte.

The peroxide yield ( $HO_2^-$  %) and the corresponding electron transfer number (n) were calculated based on the following formula:

$$HO_2^- = 200 \times \frac{(I_r/N)}{I_d + (I_r/N)} \%$$

$$n = 4 \times \frac{I_d}{I_d + (I_r/N)}$$

Where the  $I_r$  and  $I_d$  denote the ring current and ring current, respectively. The N is the

collection efficiency of the Pt ring electrode (N=18% in this work).

The selectivity of the prepared-catalyst for the electrosynthesis of hydrogen peroxide was observed by comparing the CV curves recorded in a N<sub>2</sub>-saturated electrolyte with those in an O<sub>2</sub>-saturated electrolyte.

The electron transfer number (n) of the obtained-catalyst was further investigated via linear sweeping voltammetry with scanning rate of 5 mV s<sup>-1</sup> at various rotating speeds (425,625,1200,1600 and 2025 r.p.m.). The Koutecky-Levich equation was taken to calculate the number of electrons transferred during the ORR by plotting the inverse of  $i_{dl}^{-1}$  (diffusion limiting current), which as a function of  $\omega^{-1/2}$  (rotating speed, rad s<sup>-1</sup>):

$$i^{-1} = i_k^{-1} + i_{dl}^{-1} + i_k^{-1} + \frac{1}{0.62nFAC_{O_2}D_{O_2}^{\frac{2}{3}}\nu^{-\frac{1}{6}}\omega^{\frac{1}{2}}}$$

And then the n can be derived from B on the basis of Koutecky-Levich equation:

$$B = (n0.62FAC_{O_2}D_{O_2}^{\frac{2}{3}}\nu^{-\frac{1}{6}})^{-1}$$

Where  $D_{O_2}$  ( $1.9 \times 10^{-5}$  cm<sup>2</sup> s<sup>-1</sup>),  $C_{O_2}$  ( $1.2 \times 10^{-6}$  mol cm<sup>-3</sup>),  $\nu$  (0.01 cm<sup>2</sup> s<sup>-1</sup>) denote the diffusion coefficient of O<sub>2</sub>, the concentration of the dissolved O<sub>2</sub> and the kinematic viscosity in 0.1M KOH, respectively. The F (95485 C mol<sup>-1</sup>) is the Faraday constant, A (0.2475 cm<sup>2</sup>) is the geometric area of glassy carbon rotation disk electrode, and  $\omega$  is the rotational speed of the work electrode.

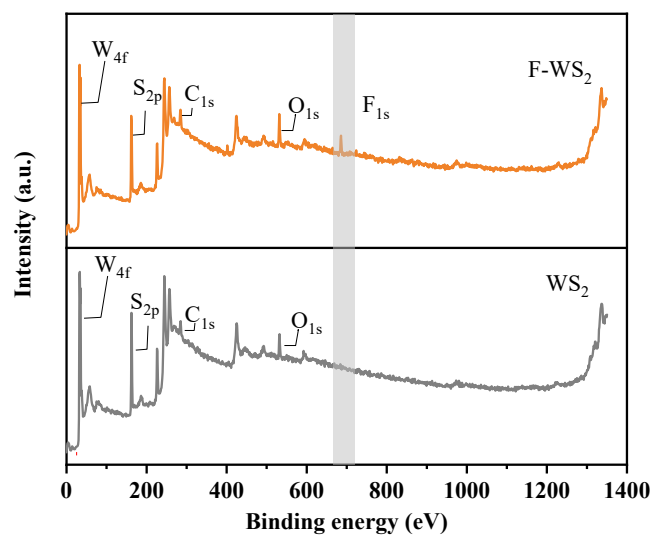

**Figure S1** XPS survey scan of WS<sub>2</sub> and F-WS<sub>2</sub> electrocatalysts.

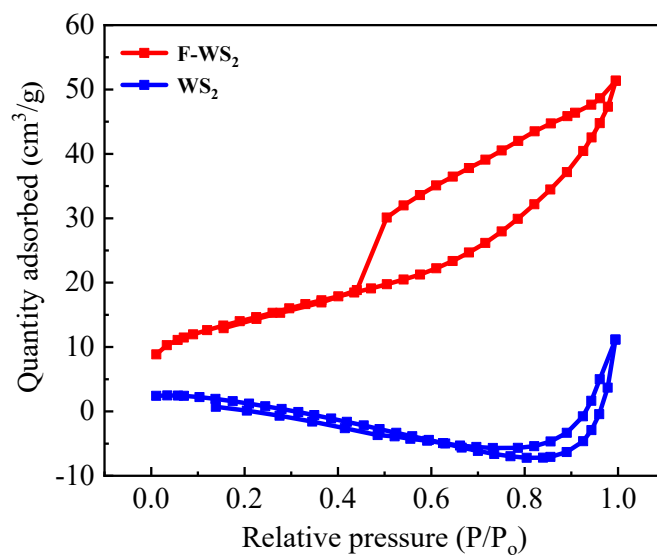

**Figure S2** N<sub>2</sub> isothermal adsorption/desorption curves of F-WS<sub>2</sub> and WS<sub>2</sub>.

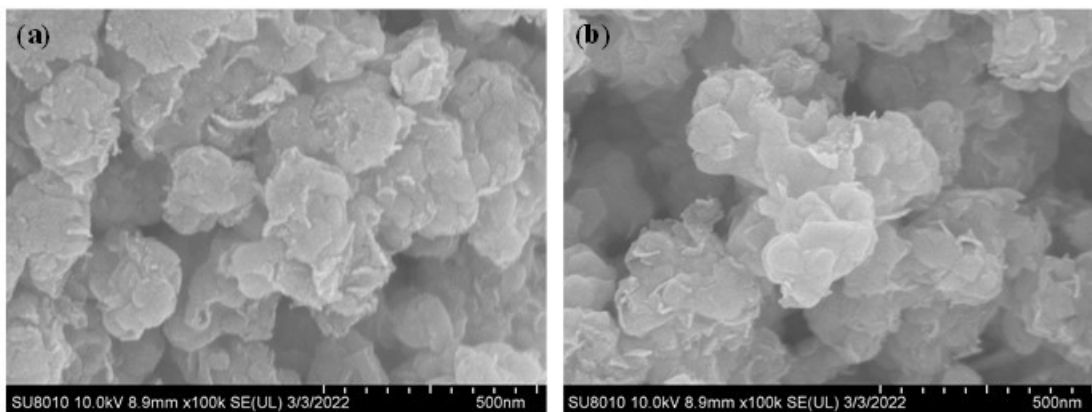

**Figure S3** SEM images of WS<sub>2</sub> (a) and F-WS<sub>2</sub> (b) electrocatalysts.

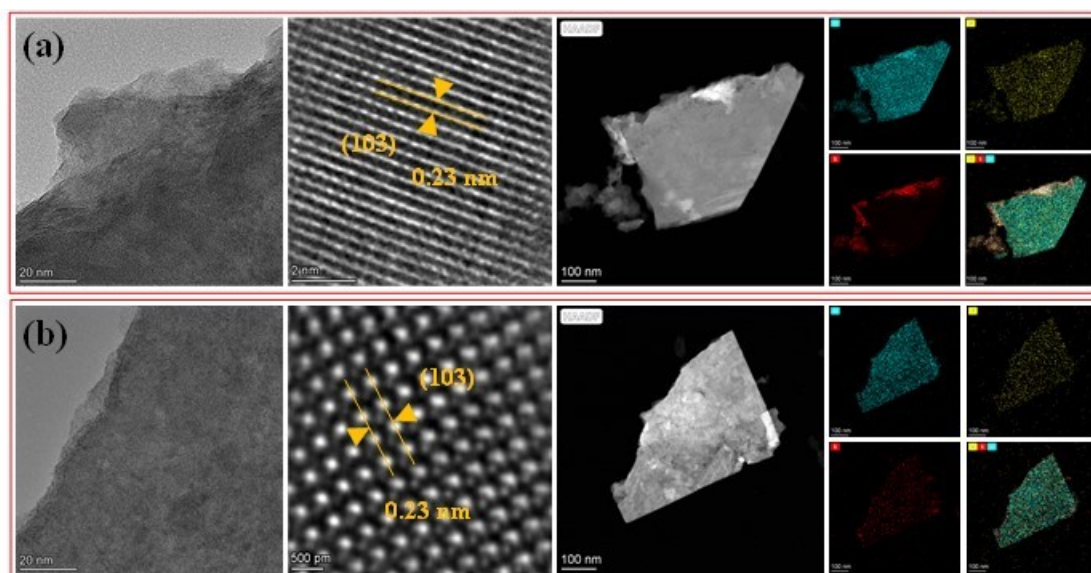

**Figure S4** TEM image of F-WS<sub>2</sub> at edge sites (a) and in-plane (b).

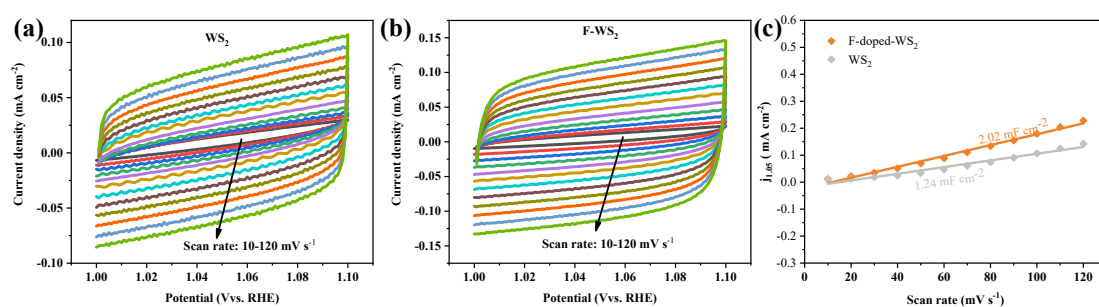

**Figure S5** Cyclic voltammograms of WS<sub>2</sub> (a) and F-WS<sub>2</sub> (b). (c) Double layer capacitances of WS<sub>2</sub> and F-WS<sub>2</sub>.

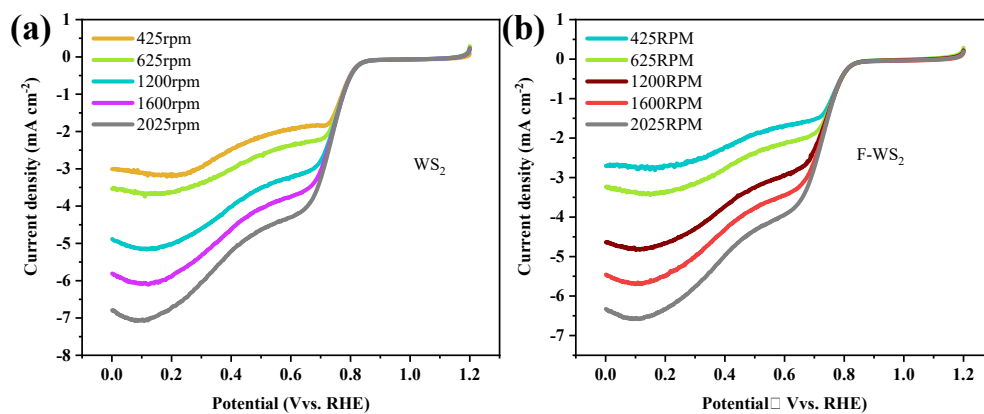

**Figure S6** LSV curves of WS<sub>2</sub> and F-WS<sub>2</sub> with different rotation speeds.

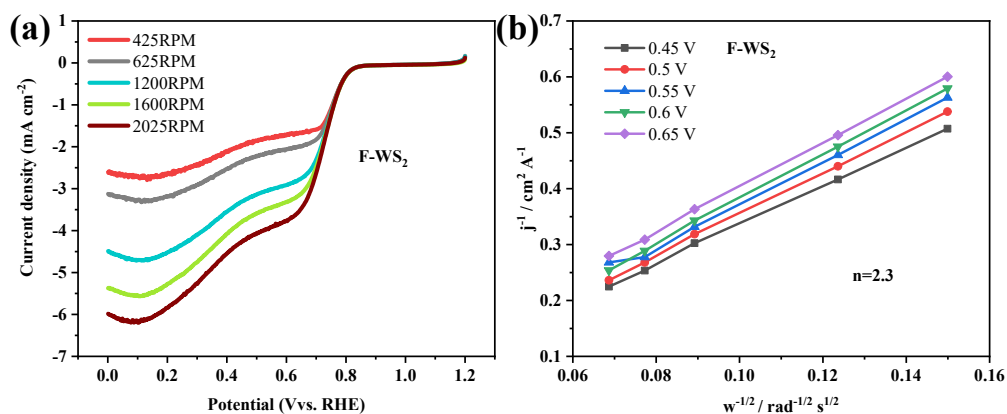

**Figure S7** LSV curves of F-WS<sub>2</sub> and related numbers of transferred electrons after 1000 cycles.

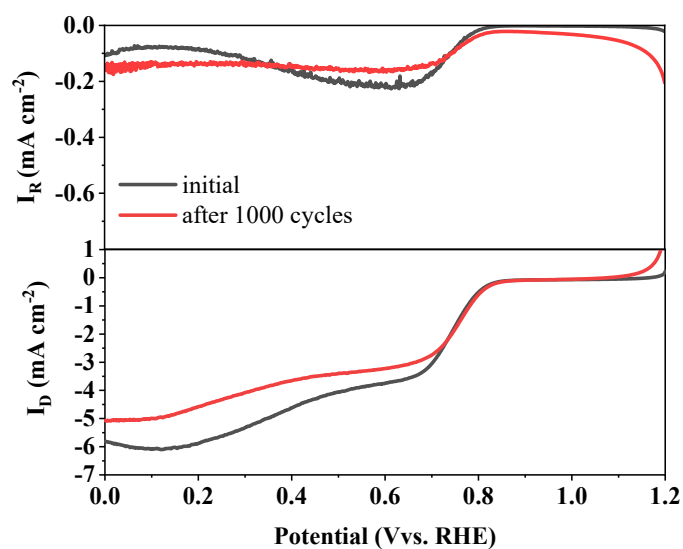

**Figure S8** Disk- and ring- current densities of WS<sub>2</sub> before and after 1000 cycles.



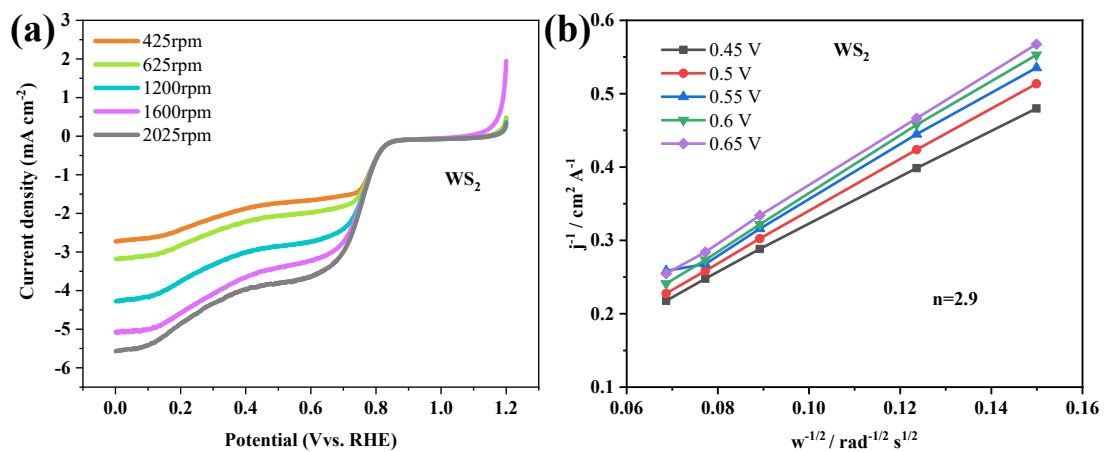

**Figure S9** LSV curves and related numbers of transferred electrons of  $\text{WS}_2$  after 1000 cycles.

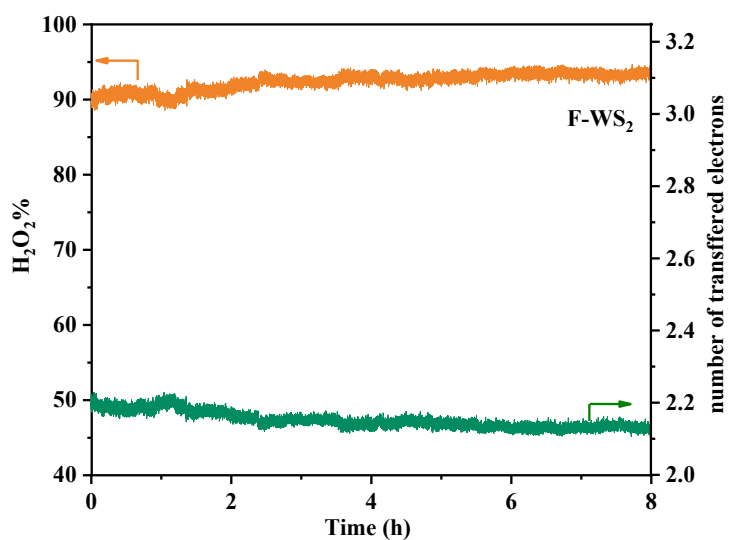

**Figure S10**  $\text{H}_2\text{O}_2$  generation and numbers of transferred electrons of  $\text{F-WS}_2$  during i-t test.

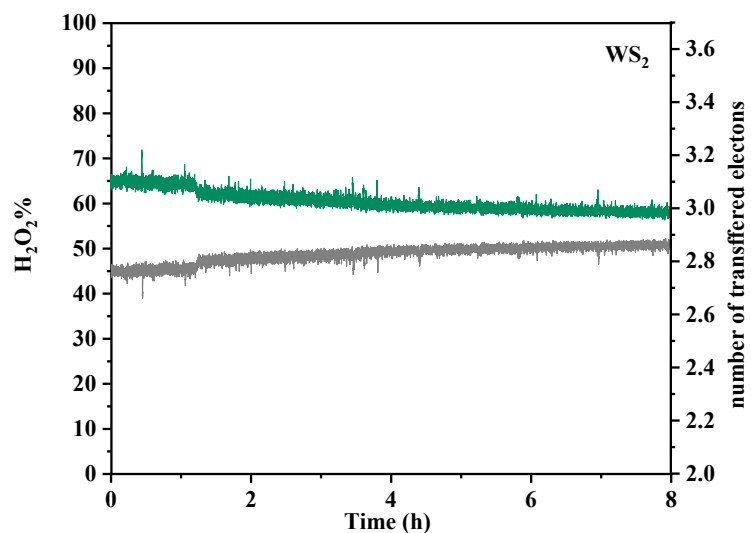

**Figure S11** H<sub>2</sub>O<sub>2</sub> generation and numbers of transferred electrons of WS<sub>2</sub> during i-t test.

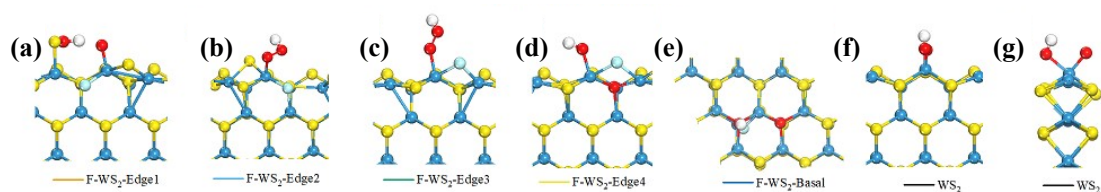

**Figure S12** Chemical structures of OOH species on various F-WS<sub>2</sub> and WS<sub>2</sub>.
